# Supplementary material
Source: HighWire-hosted journal article supplement (https://bmjopen.bmj.com/content/9/5/e027728)
Supplement: inline-supplementary-material-2 [file inline-supplementary-material-2.pdf]

## Supplementary File 2. Sample EMBASE search strategy

| Topic                                                         |    | Search Term                                                                |
|---------------------------------------------------------------|----|----------------------------------------------------------------------------|
| i. prevalence and incidence                                   | 1  | dynapen* OR “muscle weakness”                                              |
|                                                               | 2  | obes* OR fat OR bmi*                                                       |
|                                                               | 3  | 1 & 2                                                                      |
|                                                               | 4  | aged OR older OR geriatr*                                                  |
|                                                               | 5  | 3 & 4                                                                      |
|                                                               | 6  | prevalence OR inciden*                                                     |
|                                                               | 7  | 5 & 6                                                                      |
| ii. Association with chronic disease and multimorbidity       | 8  | condition OR “condition count”                                             |
|                                                               | 9  | disease OR “disease count”                                                 |
|                                                               | 10 | multimorbid* OR “multi morbid*”                                            |
|                                                               | 11 | 5 & (8 OR 9 OR 10)                                                         |
| iii. Association with functional disability                   | 12 | disab* OR function* OR ADL or “daily activit*”                             |
|                                                               | 13 | 5 & 12                                                                     |
| iv. Association with healthcare utilisation                   | 14 | hospital* AND admission                                                    |
|                                                               | 15 | hospital* AND stay                                                         |
|                                                               | 16 | hospital* AND visit                                                        |
|                                                               | 17 | “emergency ward” OR “emergency health service”                             |
|                                                               | 18 | “health service” AND (use OR utilis*)                                      |
|                                                               | 19 | “general practitioner” OR “health practitioner” AND (visit OR appointment) |
|                                                               | 20 | 5 & (14 OR 15 OR 16 OR 17 OR 18 OR 19)                                     |
| Apply human studies and English language only filters for all |    |                                                                            |
